# Supplementary material for: Endothelial Notch Signaling Regulates the Function of the Retinal Pigment Epithelial Barrier via EC Angiocrine Signaling
Source: MDPI journal article supplement (doi:10.3390/antiox12111979), 2023-11-07
Supplement: s1 [file s1]

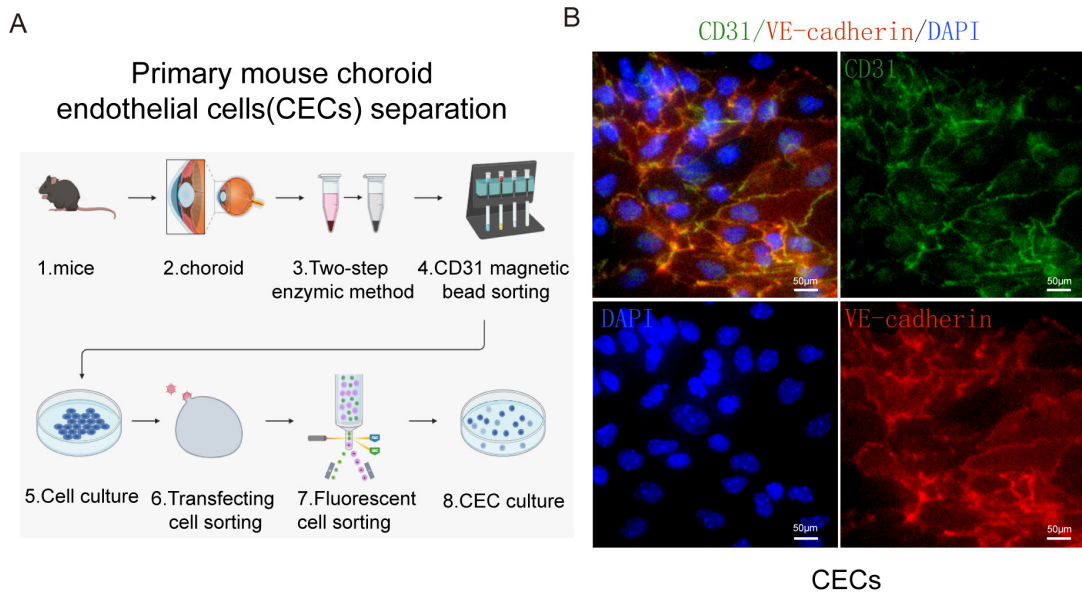

**Figure S1.** extraction and identification of CEC. **(A)** Flow chart for the isolation and culture of mice CECs. **(B)** Immunofluorescence staining of CECs with CD31 and VE-cadherin Scale bars: 50  $\mu\text{m}$ .

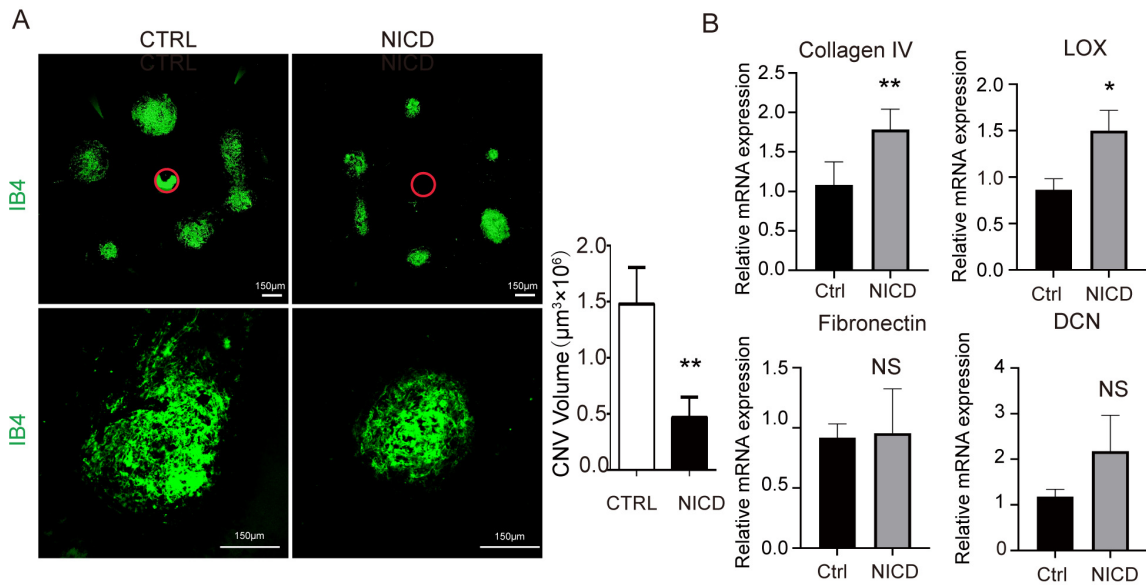

**Figure S2.** endothelial Notch signaling activation alleviates mice CNV injuries. **(A)** In laser induced CNV model, whole-mount choroidal for EC-specific NICD overexpressing mouse CDH5-CRE-NICD (NICD) and control mice (CTRL) were analyzed using IB-4 staining. IB-4 positive areas were quantitatively compared. Scale bars: 150  $\mu\text{m}$ . **(B)** mRNA levels of ECM related genes DCN, collagen IV, fibronectin and LOX in choroidal tissue were tested in EC-specific NICD overexpressing mouse CDH5-CRE-NICD (NICD) and control mice (CTRL) at CNV day7 by qRT-PCR. Three biological replicates were performed and dates are present as the mean  $\pm$  SEM. NS, no significance, \*  $p < 0.05$ , \*\*  $p < 0.01$ .
